# Supplementary material for: Probing the floral developmental stages, bisexuality and sex reversions in castor (Ricinus communis L.)
Source: PubMed Central journal article supplement (PMC7895920; doi:10.1038/s41598-021-81781-9), 2021-02-19
Supplement: 41598_2021_81781_MOESM1_ESM.pdf [file 41598_2021_81781_MOESM1_ESM.pdf]

# Probing the Floral Developmental Stages, Bisexuality and Sex Reversions in Castor (*Ricinus communis* L.)

## Scientific Reports

Sujatha Thankeswaran Parvathy<sup>1\*</sup>, Amala Joseph Prabakaran<sup>2</sup> and Thadakamalla Jayakrishna<sup>3</sup>

ICAR-Indian Institute of Oilseeds research, Rajendranagar, Hyderabad, Telangana, 500 030 India.

\*E-mail: sujatha.parvathy@icar.gov.in, hiisuj1@gmail.com

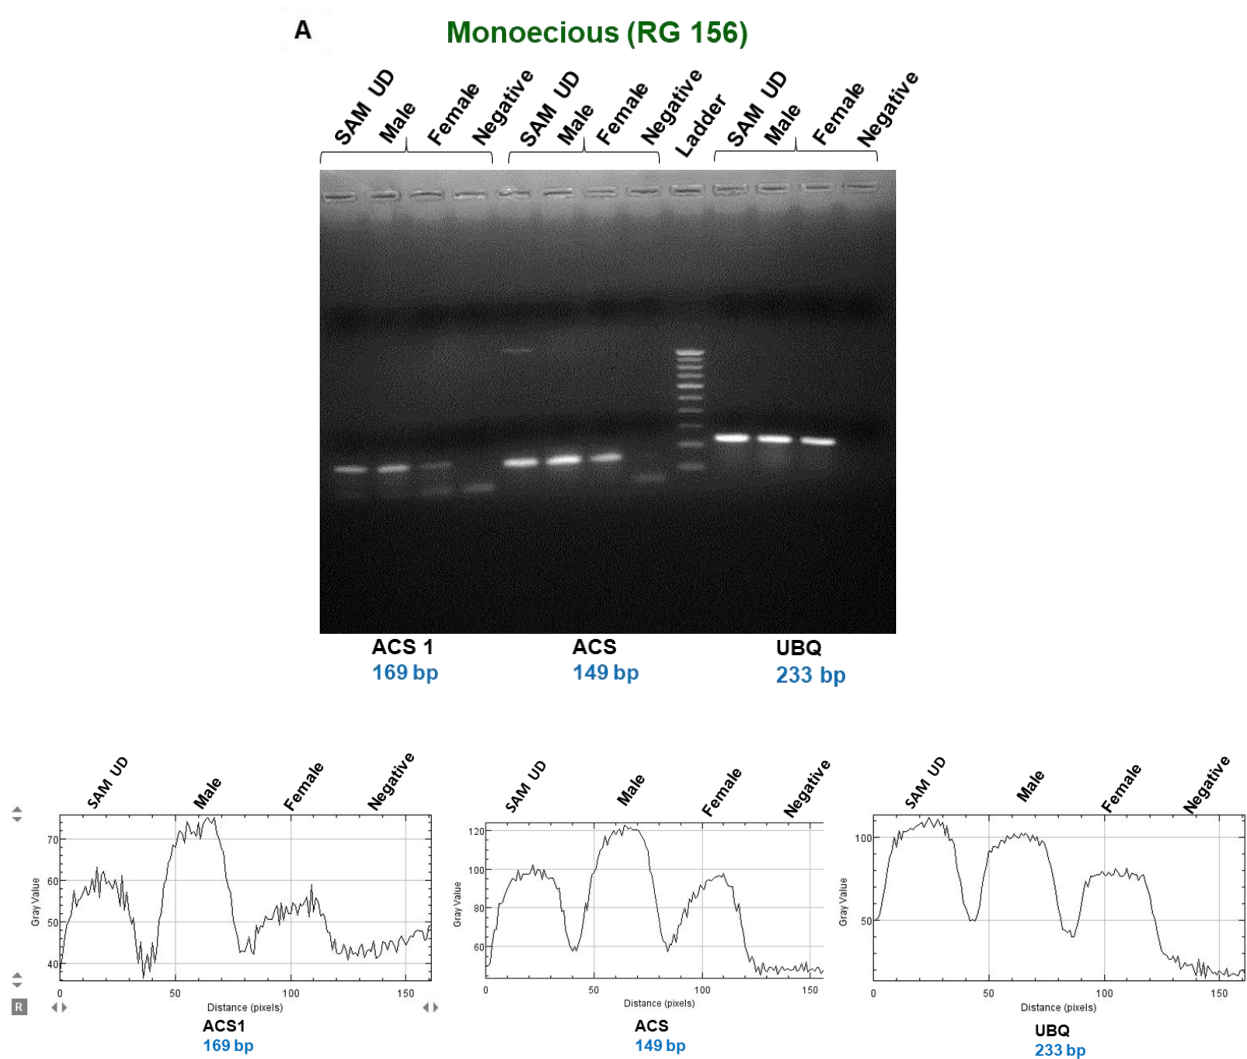

**B**

**Monoecious (DCS 107)**

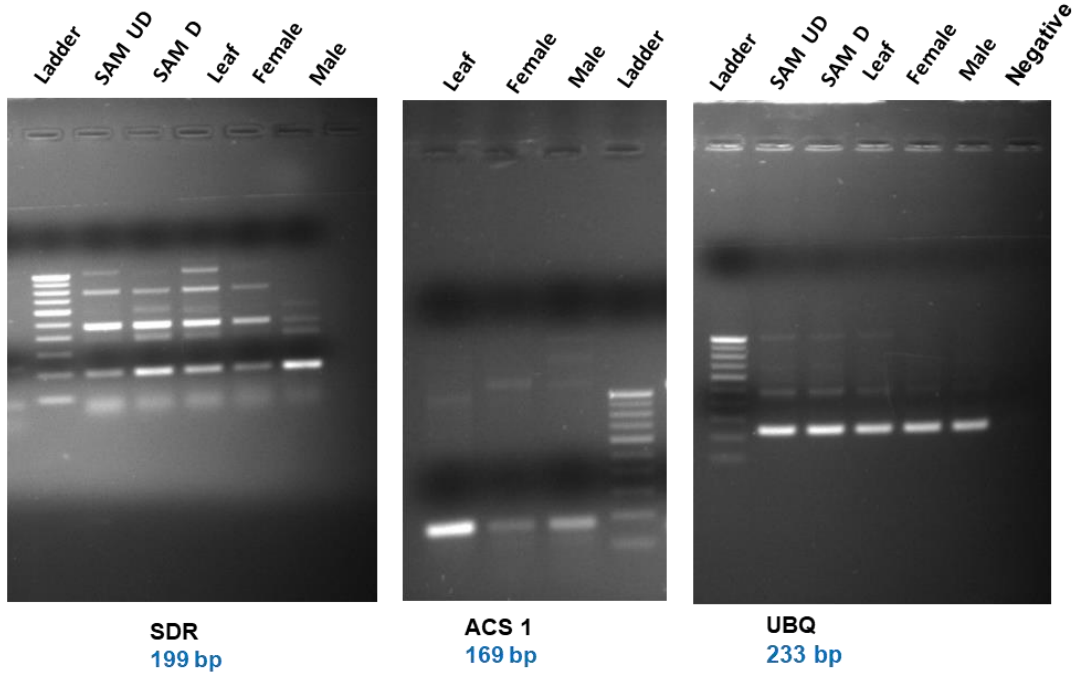

**Monoecious (DCS 107)**

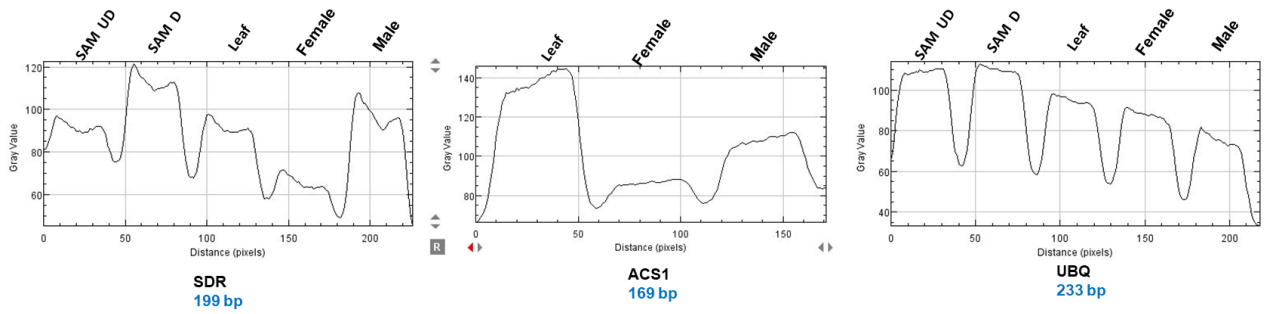

# Staminate (M 574-OS1)

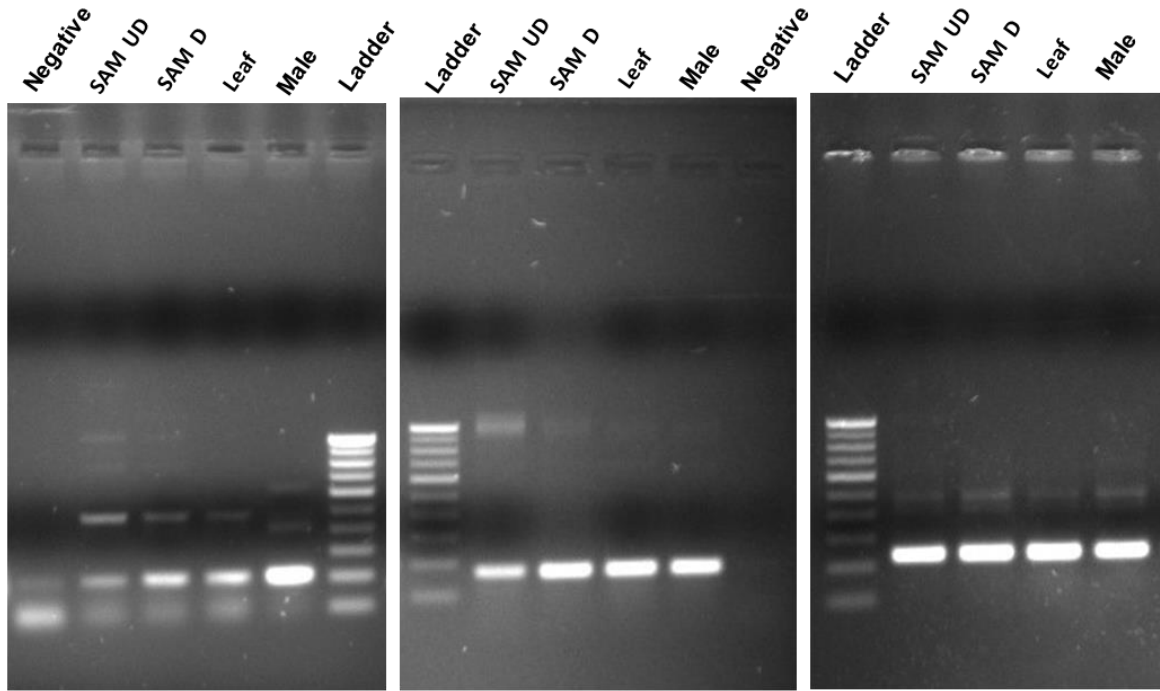

**SDR**  
199 bp

**ACS 1**  
169 bp

**UBQ**  
233 bp

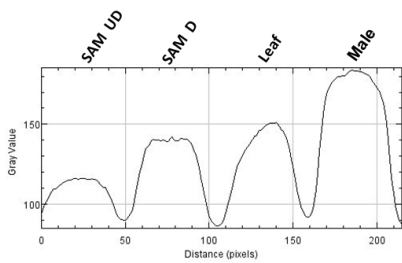

**SDR**  
199 bp

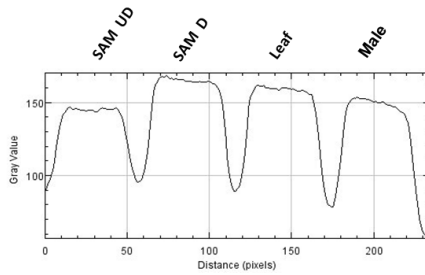

**ACS 1**  
169 bp

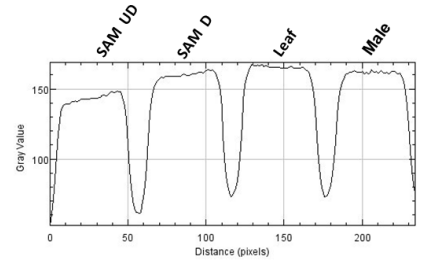

**UBQ**  
233 bp

### Pistillate (DPC 9)

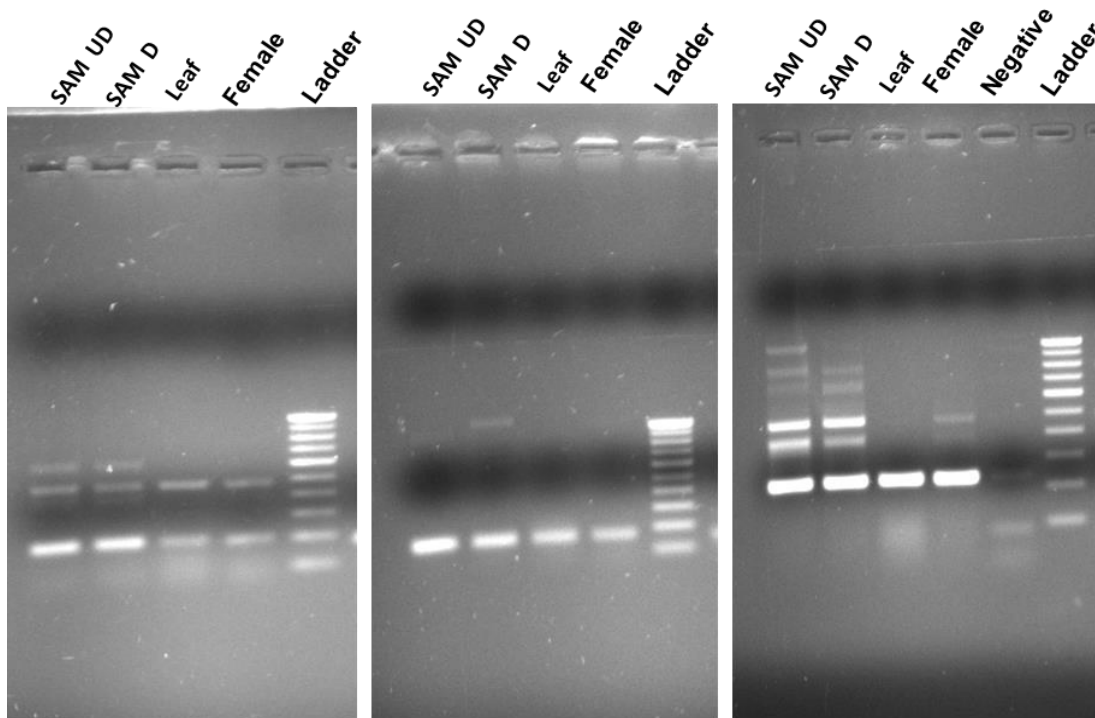

**SDR**  
199 bp

**ACS 1**  
169 bp

**UBQ**  
233 bp

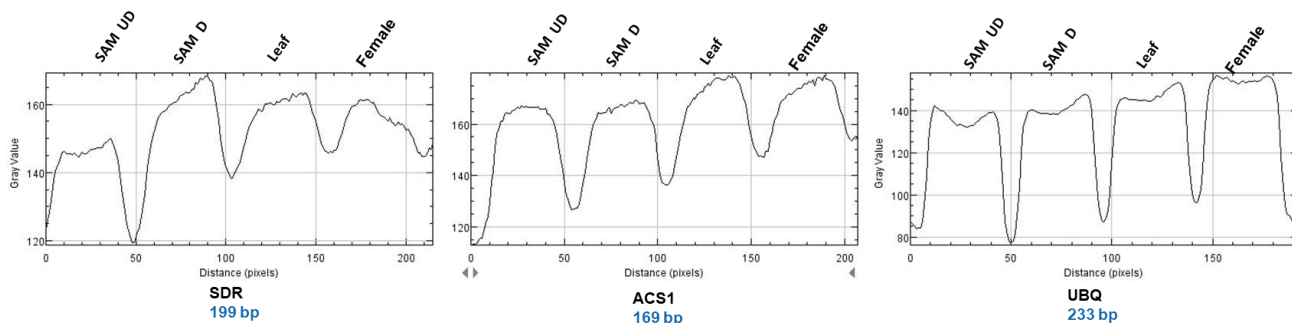

C

Monoecious (RG 156)

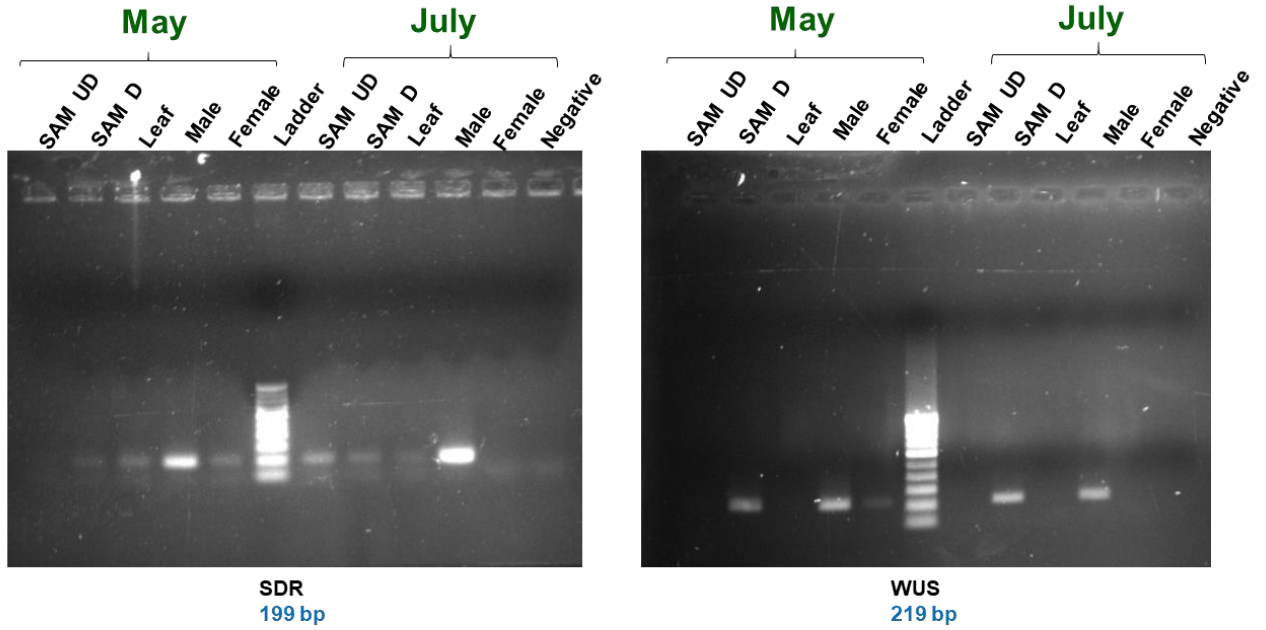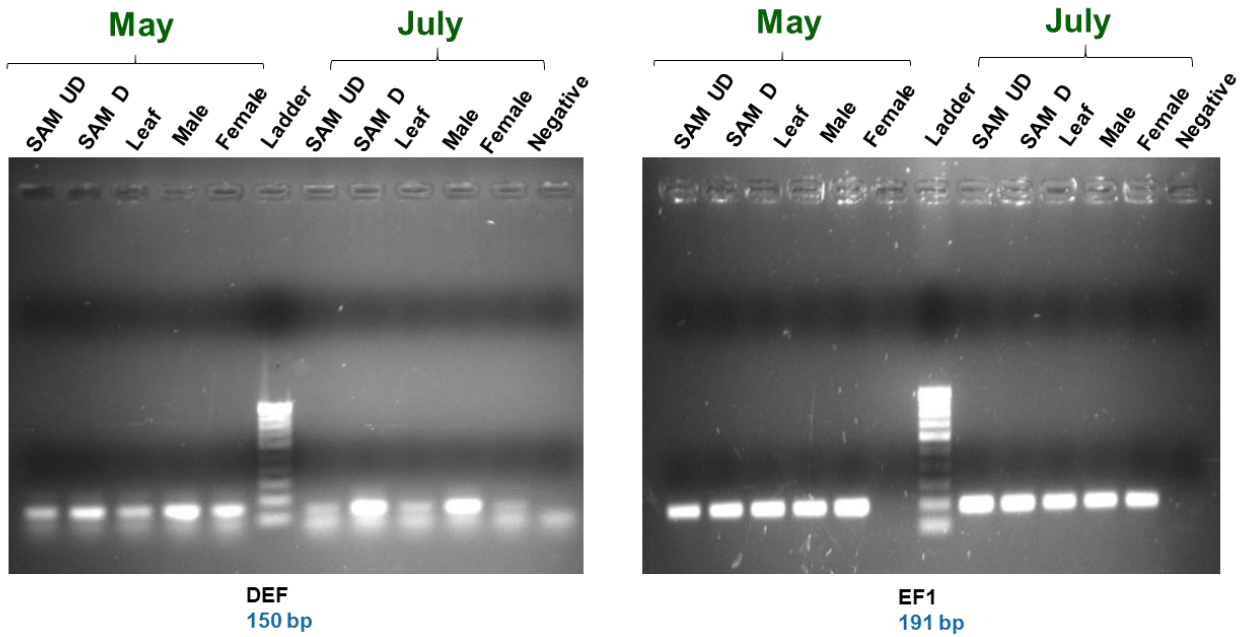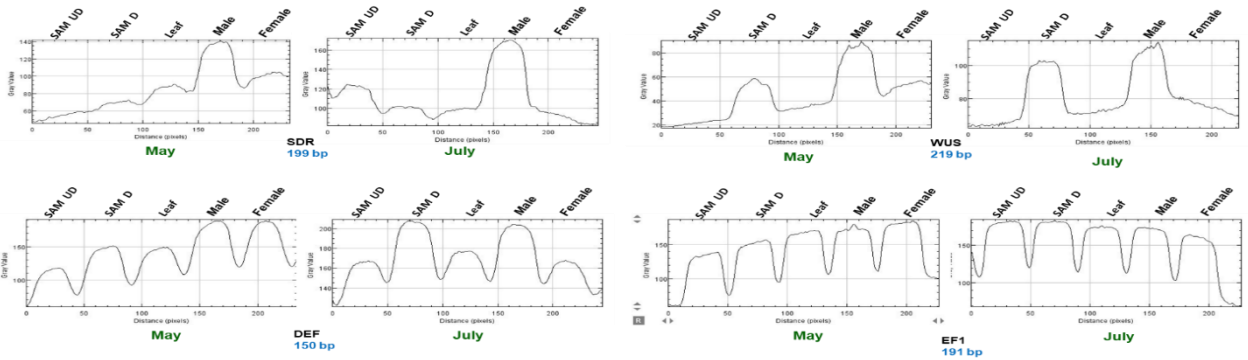

D

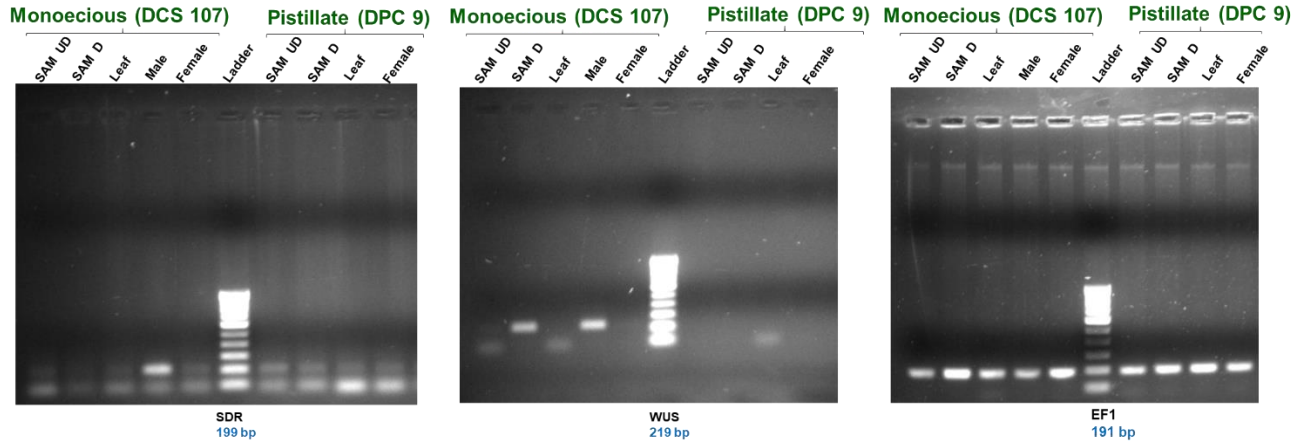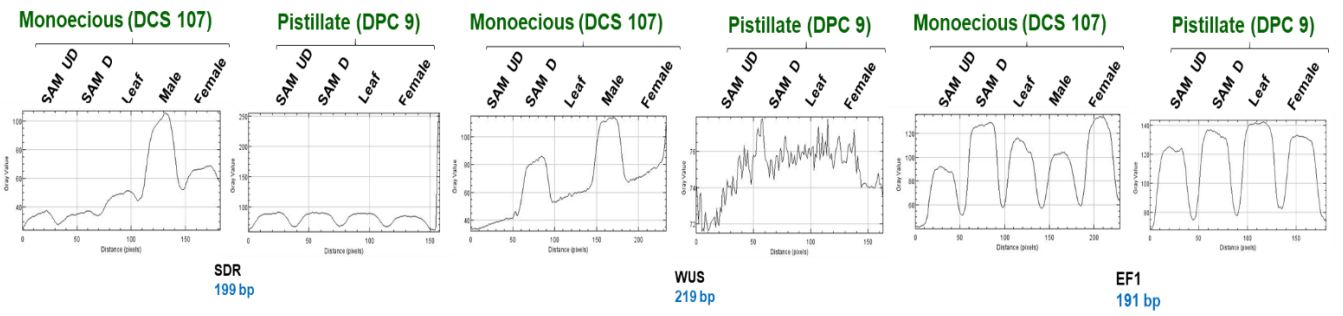

E

**Monoecious (RG 156)**

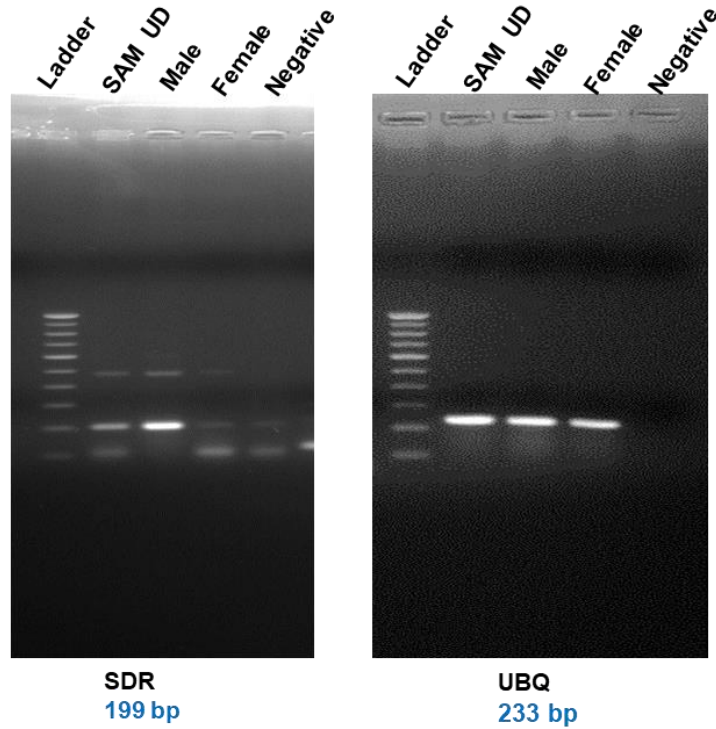





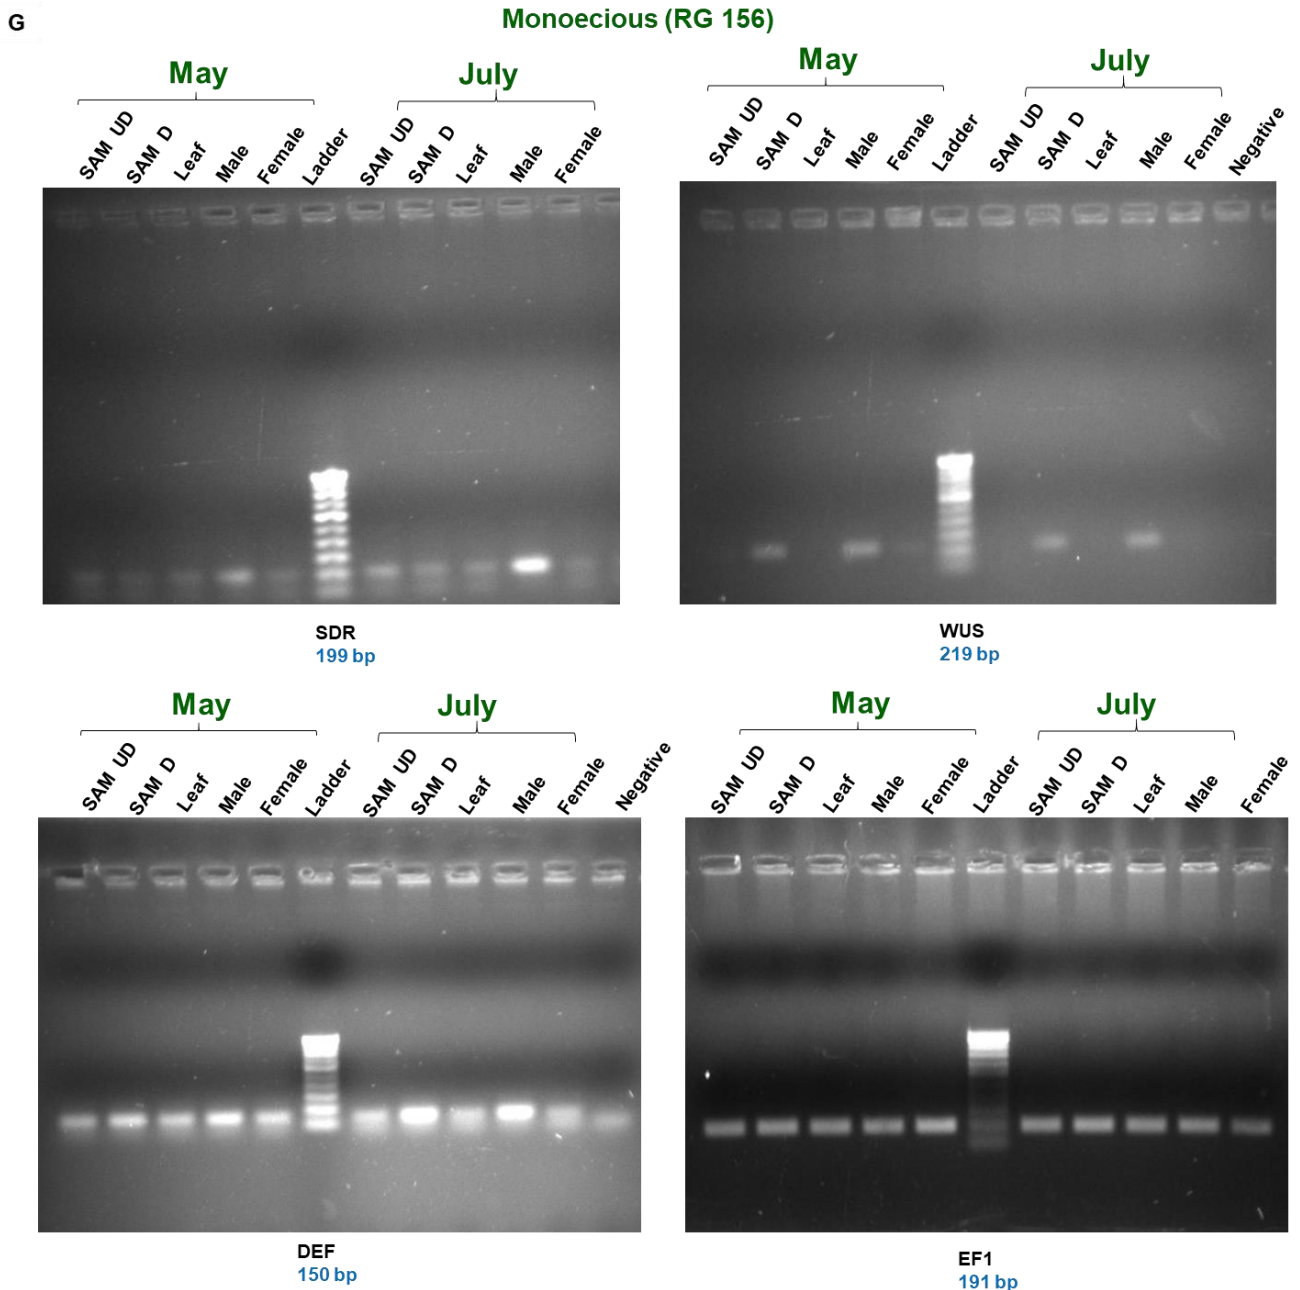

**Supplementary Figure S8: Complete or whole gels showing gene expression profiling in castor genotypes by semi-quantitative RT-PCR**

(A) Expression of 1-amino cyclopropane carboxylate synthase (*ACS* and *ACS I*) in monoecious RG 156 (B) Expression of *SDR* and *ACS I* in monoecious DCS 107, staminate M 574-OS1 and Pistillate DPC 9 genotypes. (C) Expression of *SDR*, *DEF* and *WUS* in monoecious RG156 under two temperature conditions of May (high) and July (low). (D) Expression of *SDR* and *WUS* in monoecious DCS 107 and pistillate DPC 9. (E) Expression of *SDR* in monoecious RG 156. *UBQ* is same as that in (A). (F) Expression of 6 control genes in monoecious RG 156 under two temperature conditions in May and July. (G) Reverification of expression of *SDR*, *DEF* and *WUS* in monoecious RG 156 under different temperature conditions of May and July. *UBQ* and *EF-1* are used as internal control genes. L is 100 bp ladder, Negative is water control. Shoot apical meristem (SAM UD), differentiated SAM or inflorescence bud at stage II (SAM D), young growing leaf from inflorescence bud (leaf), young male and female buds are indicated.



The plot profiles for band intensity comparison generated using Image J is given for gels (A-E). \*Non-specific amplification in one-step RT-PCR using random hexamers in (A), (B) and (E) were absent in (C), (D), (F) and (G) in two-step RT-PCR when oligo dT was used for cDNA synthesis. Experiments (A), (B) and (E) were carried out during 2015-17 and (C), (D), (F) and (G) during 2018. Samples for (A) were and (E) were collected during May 2015 and (B) collected during mid-February to 1<sup>st</sup> week of March 2017.
